# Supplementary material for: Suppressing Ag2Te nanoprecipitates for enhancing thermoelectric efficiency of AgSbTe2
Source: Royal Society of Chemistry journal article supplement (doi:10.1039/d3nr04584f), 2023-01-01
Supplement: d3nr04584f1.pdf [file d3nr04584f1.pdf]

SUPPORTING INFORMATION

**Suppressing Ag<sub>2</sub>Te Nanoprecipitates for Enhancing  
Thermoelectric Efficiency of AgSbTe<sub>2</sub>**

Zichen Gong<sup>1,2#</sup>, Kivanc Saglik<sup>1,3#</sup>, Jing Wu<sup>1,2</sup>, Ady Suwardi<sup>1,2</sup>, and Jing Cao<sup>1\*</sup>

<sup>1</sup> Institute of Materials Research and Engineering, Agency for Science, Technology and Research, Singapore 138634.

<sup>2</sup> Department of Materials Science and Engineering, National University of Singapore, Singapore 117575.

<sup>3</sup> School of Materials Science and Engineering, Nanyang Technological University, Singapore 639798.

# equal contributions: Z. Gong and K. Saglik

\*Corresponding author: [cao\\_jing@imre.a-star.edu.sg](mailto:cao_jing@imre.a-star.edu.sg)

**Keywords:** Thermoelectricity; Energy Harvesting; Sustainability; Chalcogenides; Nanoprecipitates.

Table S1. Rietveld refinement of XRD in Figure S2 for all off-stoichiometry samples without thermal annealing

| sample                                                   | UC volume | Fraction (%) | UC volume | Fraction (%) | Chi <sup>2</sup> |
|----------------------------------------------------------|-----------|--------------|-----------|--------------|------------------|
| Ag <sub>0.91</sub> Sb <sub>1.09</sub> Te <sub>2.09</sub> | 225.0841  | 100          | N.A.      | 0            | 5.89             |
| Ag <sub>0.88</sub> Sb <sub>1.12</sub> Te <sub>2.12</sub> | 225.4260  | 100          | N.A.      | 0            | 3.1              |
| Ag <sub>0.85</sub> Sb <sub>1.15</sub> Te <sub>2.15</sub> | 224.7639  | 100          | N.A.      | 0            | 3.9              |
| Ag <sub>0.82</sub> Sb <sub>1.18</sub> Te <sub>2.18</sub> | 224.9342  | 81.87        | 461.9025  | 18.13        | 4.85             |
| Ag <sub>0.79</sub> Sb <sub>1.21</sub> Te <sub>2.21</sub> | 225.2061  | 93.19        | 458.813   | 6.81         | 4.21             |

and quenching showing fraction of Sb<sub>2</sub>Te<sub>3</sub>.

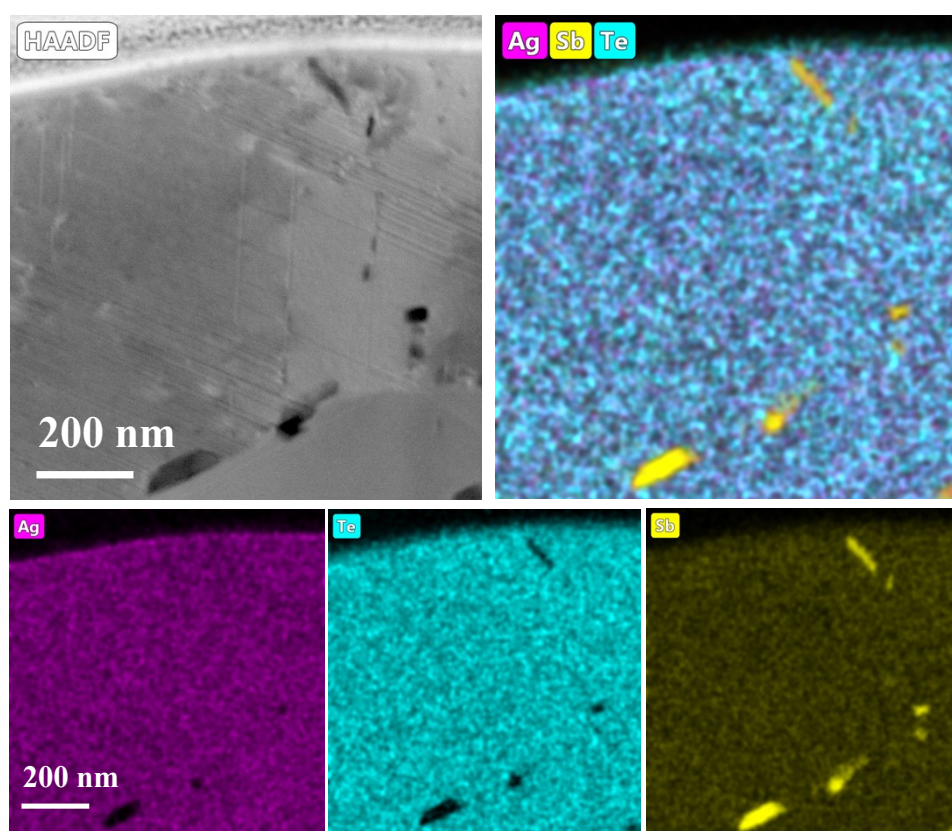

Figure S1. HAADF and EDS from HRTEM of Ag<sub>0.79</sub>Sb<sub>1.21</sub>Te<sub>2.21</sub> showing small amount of Sb-rich regions.

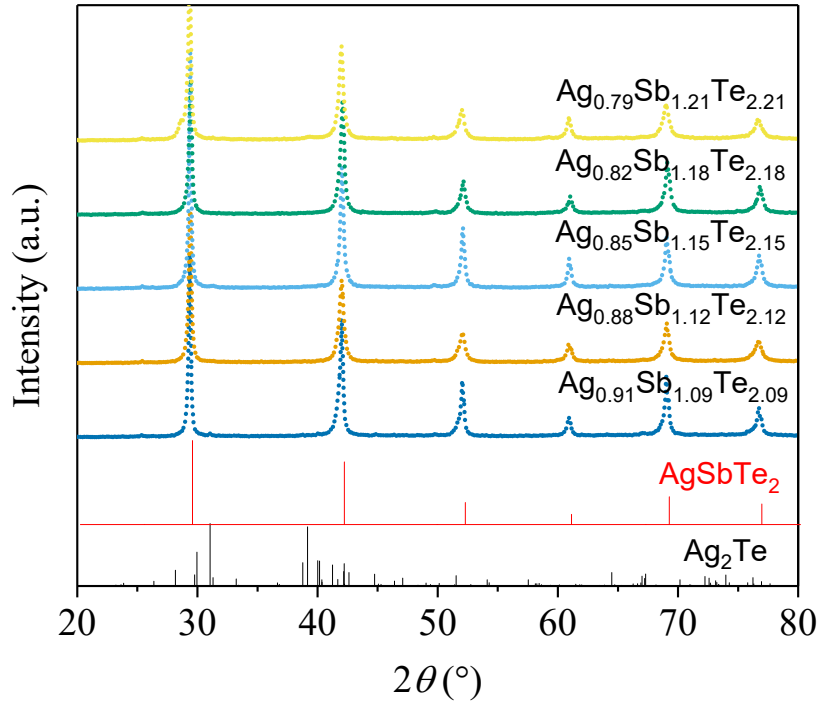

Figure S2. XRD (x-ray diffraction) for samples without thermal annealing and quenching.

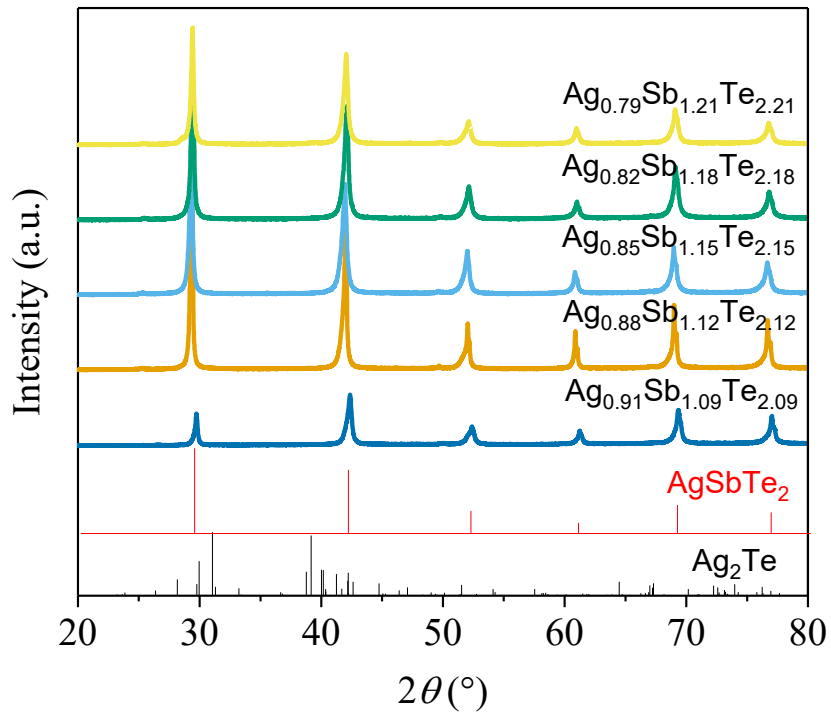

Figure S3. XRD (x-ray diffraction) for all samples annealed at 773 K followed by quenching after transport properties testing.

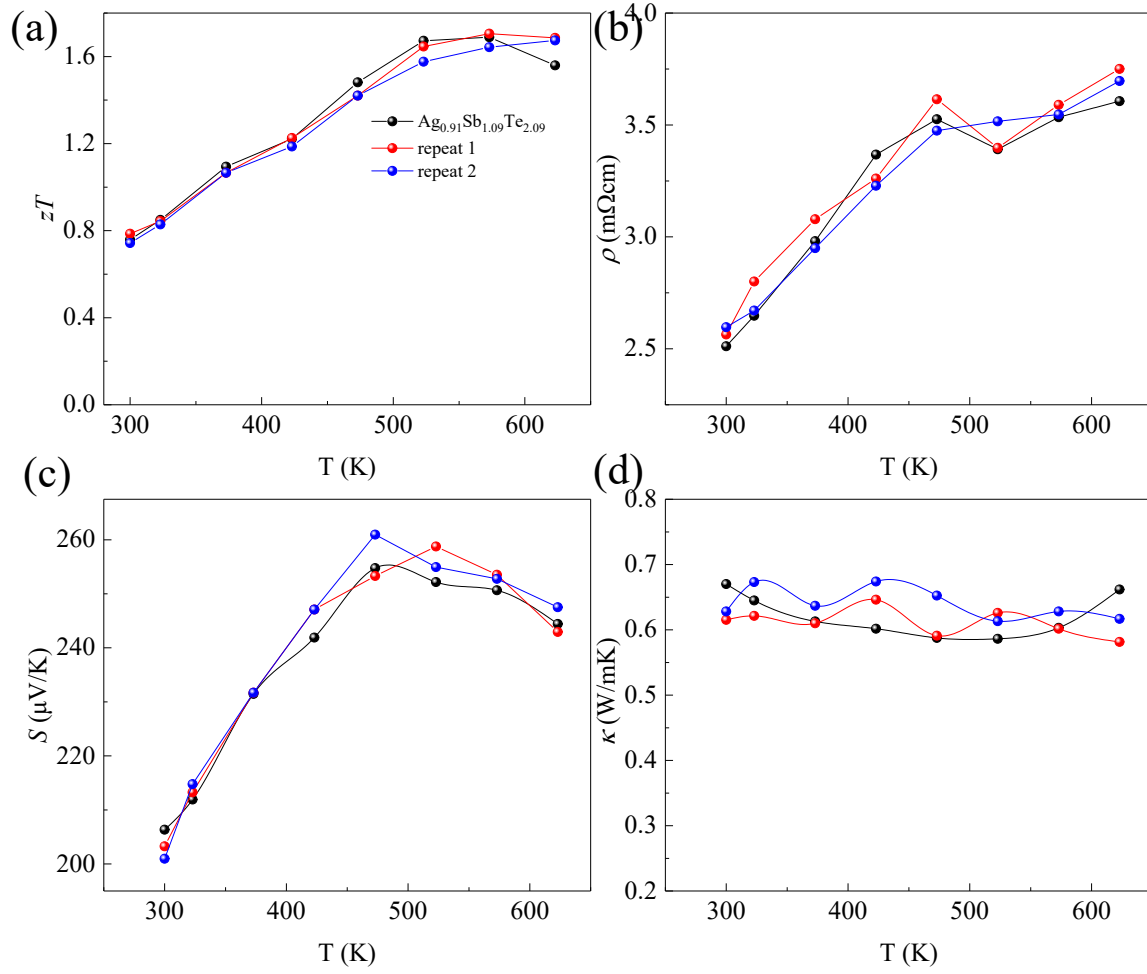

Figure S4. Cyclic testing of heating-cooling for  $\text{Ag}_{0.91}\text{Sb}_{1.09}\text{Te}_{2.09}$  sample (a)  $zT$  (b) electrical resistivity (c) Seebeck coefficient and (d) thermal conductivity.

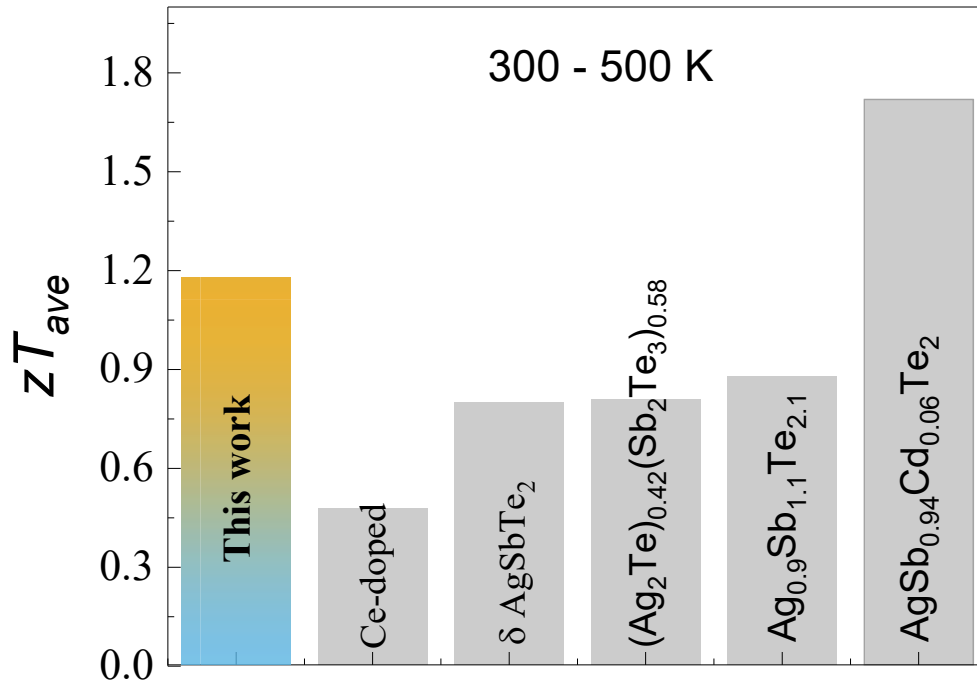

Figure S5. Literature comparison of average  $zT$  in this work with literatures between 300 – 500 K.<sup>1-4</sup>

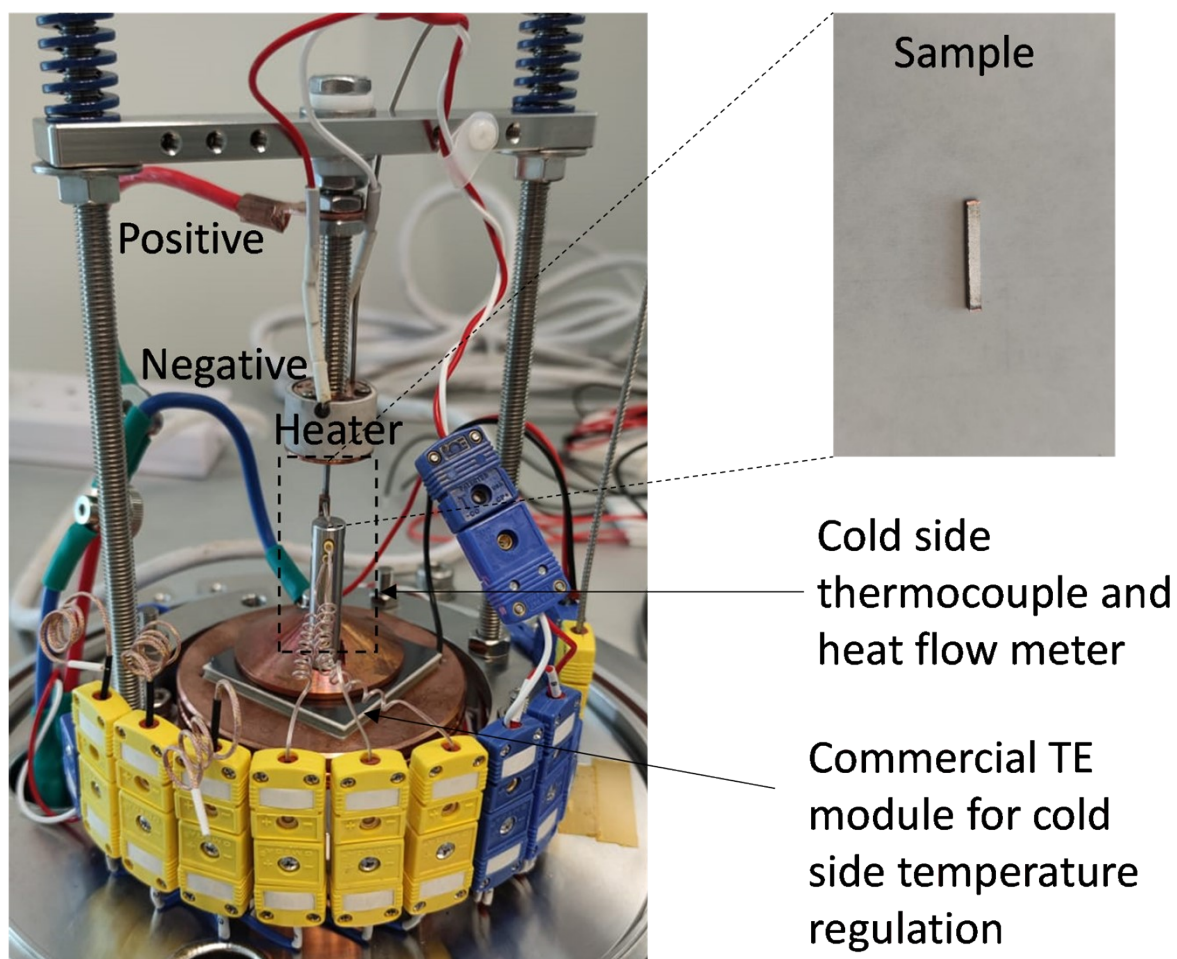

Figure S6. Single leg setup schematic.

## References

1. J. K. Lee, M.-W. Oh, B. Ryu, J. E. Lee, B.-S. Kim, B.-K. Min, S.-J. Joo, H.-W. Lee and S.-D. Park, *Scientific Reports*, 2017, **7**, 4496.
2. J. K. Lee, B. Ryu, S. Park, J. H. Son, J. Park, J. Jang, M.-W. Oh and S. Park, *Acta Materialia*, 2022, **222**, 117443.
3. Y. Wu, Q. Liang, X. Zhao, H. Wu, P. Zi, Q. Tao, L. Yu, X. Su, J. Wu and Z. Chen, *ACS Applied Materials & Interfaces*, 2022, **14**, 3057-3065.
4. Y. Wu, P. Qiu, Y. Yu, Y. Xiong, T. Deng, O. Cojocaru-Miredin, M. Wuttig, X. Shi and L. Chen, *Journal of Materiomics*, 2022, **8**, 1095-1103.
